# Supplementary material for: Characterization and Formulation of Isoniazid for High-Dose Dry Powder Inhalation
Source: MDPI journal article supplement (doi:10.3390/pharmaceutics11050233), 2019-05-13
Supplement: s1 [file s1]

## Supplementary Materials: Characterization and Formulation of Isoniazid for High-Dose Dry Powder Inhalation

Imco Sibum, Paul Hagedoorn, Henderik W. Frijlink and Floris Grasmeijer

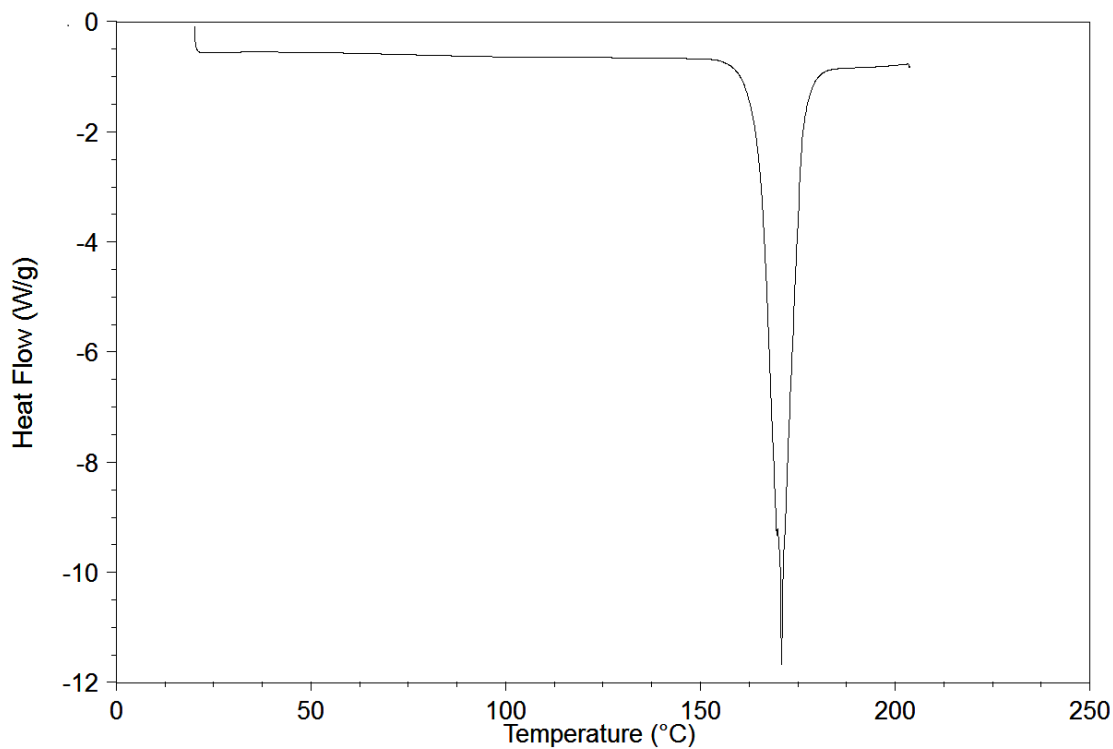

**Figure S1.** Representative DSC data showing that all samples were crystalline.
